# Supplementary material
Source: PubMed Central journal article supplement (PMC8882632)
Supplement: annrheumdis-2021-221636supp001.pdf [file annrheumdis-2021-221636supp001.pdf]

**Supplementary Table 1: Ordinal regression models examining characteristics associated with more severe COVID-19 outcomes in individuals with SLE.**

|                             | Model 1            |                         | Model 2<br>(Adding comorbidity count) |                        | Model 3<br>(Adding specific comorbidities) |                        |
|-----------------------------|--------------------|-------------------------|---------------------------------------|------------------------|--------------------------------------------|------------------------|
|                             | OR (95% CI)        | p-value                 | OR (95% CI)                           | p-value                | OR (95% CI)                                | p-value                |
| <b>Age</b> (continuous)     | 1.04 (1.03, 1.05)  | 1.2x10 <sup>-15</sup>   | 1.02 (1.01, 1.03)                     | 1.9x10 <sup>-5**</sup> | 1.03 (1.02, 1.04)                          | 1.1x10 <sup>-6**</sup> |
| <b>Sex</b>                  |                    |                         |                                       |                        |                                            |                        |
| Female                      | Ref                |                         |                                       |                        |                                            |                        |
| Male                        | 1.55 (1.06, 2.27)  | 2.3x10 <sup>-2*</sup>   | 1.59 (1.08, 2.35)                     | 1.9x10 <sup>-2*</sup>  | 1.50 (1.02, 2.21)                          | 3.9x10 <sup>-2*</sup>  |
| <b>Region</b>               |                    |                         |                                       |                        |                                            |                        |
| Europe                      | Ref                |                         |                                       |                        |                                            |                        |
| U.S & Canada                | 1.22 (0.34, 4.43)  | 0.76                    | 0.96 (0.26, 3.61)                     | 0.95                   | 0.92 (0.25, 3.44)                          | 0.90                   |
| Latin America               | 2.23 (0.99, 5.02)  | 5.4x10 <sup>-2</sup>    | 1.97 (0.86, 4.52)                     | 0.11                   | 1.93 (0.84, 4.43)                          | 0.12                   |
| Other                       | 5.30 (2.47, 11.36) | 1.8 x10 <sup>-5**</sup> | 4.71 (2.16, 10.27)                    | 9.8x10 <sup>-5**</sup> | 4.97 (2.29, 10.80)                         | 5.0x10 <sup>-5**</sup> |
| <b>Time period</b>          |                    |                         |                                       |                        |                                            |                        |
| <=June 15, 2020             | Ref                |                         |                                       |                        |                                            |                        |
| June 16-Sept 30, 2020       | 0.50 (0.36, 0.71)  | 1.1x10 <sup>-4**</sup>  | 0.49 (0.34, 0.71)                     | 1.2x10 <sup>-4**</sup> | 0.50 (0.35, 0.71)                          | 1.4x10 <sup>-4**</sup> |
| Oct 1, 2020- April 12, 2021 | 0.38 (0.28, 0.53)  | 9.2x10 <sup>-9**</sup>  | 0.39 (0.28, 0.55)                     | 5.8x10 <sup>-8**</sup> | 0.39 (0.28, 0.55)                          | 4.8x10 <sup>-8**</sup> |
| <b>GC Dose</b>              |                    |                         |                                       |                        |                                            |                        |

|                                                                                                                            |                   |                        |                   |                         |                   |                        |
|----------------------------------------------------------------------------------------------------------------------------|-------------------|------------------------|-------------------|-------------------------|-------------------|------------------------|
| 0 mg/day                                                                                                                   | Ref               |                        |                   |                         |                   |                        |
| 1-5 mg/day                                                                                                                 | 2.06 (1.45, 2.92) | 4.8x10 <sup>-5**</sup> | 1.93 (1.35, 2.77) | 3.0x10 <sup>-4**</sup>  | 1.86 (1.39, 2.66) | 6.4x10 <sup>-4**</sup> |
| 6-9 mg/day                                                                                                                 | 2.86 (1.50, 5.46) | 1.4x10 <sup>-3**</sup> | 2.66 (1.37, 5.17) | 3.9x10 <sup>-3**</sup>  | 2.82 (1.45, 5.47) | 2.2x10 <sup>-3**</sup> |
| =>10 mg/day                                                                                                                | 3.25 (2.21, 4.76) | 1.9x10 <sup>-9**</sup> | 2.78 (1.87, 4.12) | 4.2x10 <sup>-7**</sup>  | 2.58 (1.74, 3.82) | 2.6x10 <sup>-6**</sup> |
| <b>Medication Category</b>                                                                                                 |                   |                        |                   |                         |                   |                        |
| Antimalarial only                                                                                                          | Ref               |                        |                   |                         |                   |                        |
| No SLE therapy                                                                                                             | 2.11 (1.40, 3.18) | 3.3x10 <sup>-4**</sup> | 2.02 (1.33, 3.07) | 1.1x10 <sup>-3**</sup>  | 1.95 (1.28, 2.96) | 1.8x10 <sup>-3**</sup> |
| Monotherapy with methotrexate, leflunomide, or sulfasalazine only <sup>#</sup>                                             | 0.68 (0.41, 1.12) | 0.13                   | 0.73 (0.44, 1.22) | 0.23                    | 0.72 (0.43, 1.21) | 0.21                   |
| Monotherapy with mycophenolate/mycophenolic acid, tacrolimus, cyclophosphamide, cyclosporine, or azathioprine <sup>#</sup> | 1.29 (0.93, 1.79) | 0.13                   | 1.12 (0.80, 1.58) | 0.50                    | 1.05 (0.75, 1.47) | 0.79                   |
| Biologic/targeted synthetic drug monotherapy                                                                               | 1.46 (0.66, 3.25) | 0.36                   | 1.43 (0.62, 3.30) | 0.40                    | 1.43 (0.62, 3.30) | 0.40                   |
| Biologic/targeted synthetic drug and immunosuppressive drug combination therapy <sup>#</sup>                               | 1.28 (0.80, 2.05) | 0.30                   | 1.18 (0.73, 1.92) | 0.50                    | 1.19 (0.73, 1.92) | 0.49                   |
| <b>Number of Comorbidities (continuous)</b>                                                                                | –                 | –                      | 1.94 (1.65, 2.27) | 4.7x10 <sup>-16**</sup> | –                 | –                      |
| <b>Number of Comorbidities (excluding Renal and</b>                                                                        | –                 | –                      | –                 | –                       | 1.60 (1.23,2.06)  | 2.5x10 <sup>-4**</sup> |

|                                                               |   |   |   |   |                   |                          |
|---------------------------------------------------------------|---|---|---|---|-------------------|--------------------------|
| <b>Cardiovascular disease/Hypertension)</b>                   |   |   |   |   |                   |                          |
| <b>Chronic renal insufficiency or end stage renal disease</b> | – | – | – | – | 3.72 (2.57, 5.36) | 2.4x10 <sup>-12</sup> ** |
| <b>Cardiovascular/Hypertension</b>                            | – | – | – | – | 1.65 (1.23, 2.23) | 9.6x10 <sup>-12</sup> ** |

GC: Glucocorticoids IS: immunosuppressive; OR: Odd ratio; CI: confidence interval

#These patients could be also on antimalarials

Each model is adjusted for all variables listed; random effects applied for country and time.

\* p<0.05

\*\*p<0.01

**Supplementary Table 2. Ordinal COVID-19 severity outcome with mechanical ventilation or death combined as highest category**

|                                                | Total<br>(N=1606) |
|------------------------------------------------|-------------------|
| Not hospitalized                               | 1118 (69.6%)      |
| Hospitalized with no oxygenation               | 169 (10.5%)       |
| Hospitalized with any ventilation/ oxygenation | 179 (11.2%)       |
| Mechanical ventilation or Death                | 140 (8.7%)        |

**Supplementary Table 3. Ordinal regression model examining characteristics associated with more severe COVID-19 outcomes in individuals with SLE with mechanical ventilation or death combined as highest category**

|                                                                                                                            | OR (95% CI)        | p-value  |
|----------------------------------------------------------------------------------------------------------------------------|--------------------|----------|
| <b>Age</b> (continuous)                                                                                                    | 1.03 (1.02, 1.04)  | <0.001** |
| <b>Sex</b>                                                                                                                 |                    |          |
| Male                                                                                                                       | 1.48 (1.00, 2.20)  | 0.05.1   |
| <b>Region</b>                                                                                                              |                    |          |
| Europe                                                                                                                     | Ref.               |          |
| U.S. & Canada                                                                                                              | 0.86 (0.22, 3.28)  | 0.82     |
| Latin America                                                                                                              | 2.01 (0.87, 4.66)  | 0.10     |
| Other                                                                                                                      | 4.96 (2.26, 10.92) | <0.001** |
| <b>Time period</b>                                                                                                         |                    |          |
| ≤ June 15, 2020                                                                                                            | Ref.               |          |
| June 16-Sept 30, 2020                                                                                                      | 0.50 (0.35, 0.72)  | <0.001** |
| Oct 1, 2020- April 12, 2021                                                                                                | 0.41 (0.29, 0.57)  | <0.001** |
| <b>GC Dose</b>                                                                                                             |                    |          |
| 0 mg/day                                                                                                                   | Ref.               |          |
| 1-5 mg/day                                                                                                                 | 1.90 (1.33, 2.72)  | <0.001** |
| 6-9 mg/day                                                                                                                 | 2.41 (1.23, 4.72)  | 0.01**   |
| ⇒10 mg/day                                                                                                                 | 1.92 (1.26, 2.94)  | 0.003**  |
| <b>Medication Category</b>                                                                                                 |                    |          |
| Antimalarial only                                                                                                          | Ref.               |          |
| No SLE therapy                                                                                                             | 1.80 (1.17, 2.74)  | 0.007**  |
| Monotherapy with methotrexate, leflunomide, or sulfasalazine only <sup>#</sup>                                             | 0.73 (0.43, 1.24)  | 0.24     |
| Monotherapy with mycophenolate/mycophenolic acid, tacrolimus, cyclophosphamide, cyclosporine, or azathioprine <sup>#</sup> | 1.04 (0.73, 1.47)  | 0.83     |

|                                                                                              |                   |          |
|----------------------------------------------------------------------------------------------|-------------------|----------|
| Biologic/targeted synthetic drug monotherapy                                                 | 1.31 (0.55, 3.11) | 0.54     |
| Biologic/targeted synthetic drug and immunosuppressive drug combination therapy <sup>#</sup> | 1.22 (0.75, 1.98) | 0.43     |
| <b>Number of Comorbidities (excluding Renal and Cardiovascular disease/Hypertension)</b>     | 1.56 (1.21, 2.02) | <0.001** |
| <b>Chronic renal insufficiency or end stage renal disease</b>                                | 3.34 (2.31, 4.85) | <0.001** |
| <b>Cardiovascular/Hypertension</b>                                                           | 1.71 (1.27, 2.31) | <0.001** |
| <b>Disease Activity</b>                                                                      |                   |          |
| Remission                                                                                    | Ref.              |          |
| Minimal or low                                                                               | 0.86 (0.61, 1.21) | 0.39     |
| Moderate                                                                                     | 1.54 (0.98, 2.43) | 0.063    |
| Severe or high                                                                               | 3.67 (1.96, 6.86) | <0.001** |

Each model adjusted for all variables listed, and random effects for country and time.

GC: Glucocorticoids IS: immunosuppressive; OR: Odd ratio; CI: confidence interval

<sup>#</sup>These patients could be also on antimalarials

\* p<0.05

\*\*p<0.01
